# Supplementary material for: Artificial Neural Networks for Classification in Metabolomic Studies of Whole Cells Using 1H Nuclear Magnetic Resonance
Source: Hindawi journal article supplement (doi:10.1155/2011/158094), 2010-09-15
Supplement: f1 [file 158094.f1.pdf]

## Supplementary Information

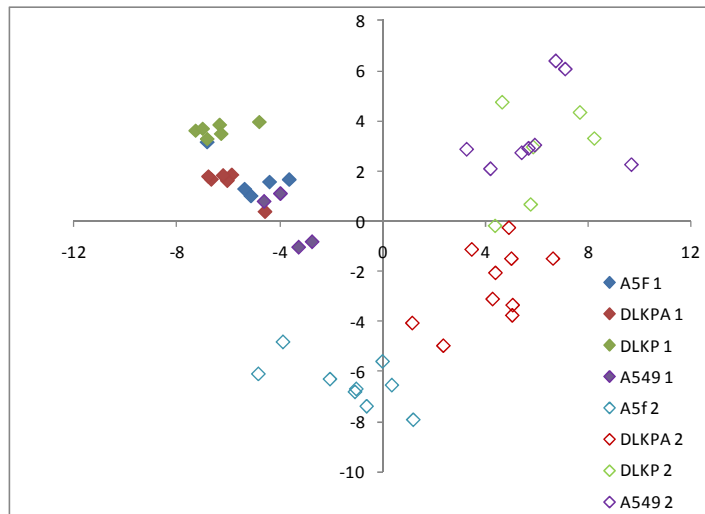

*Scores plot for the entire data set; group 1 solid markers, group 2 open markers.*
